# Supplementary material
Source: MDPI journal article supplement (https://www.mdpi.com/2073-4344/13/7/1064)
Supplement: s1 [file s1]

# Supporting Information

## Dual-modification Engineering of CoNi alloy Realizing Robust Performance for Electrocatalytic hydrogen production

*Yutong Ye<sup>+</sup>, Guorong Zhou<sup>+</sup>, Kaixun Li<sup>+</sup> and Yun Tong<sup>\*</sup>*

School of Chemistry and Chemical Engineering, Key Laboratory of Surface & Interface Science of Polymer Materials of Zhejiang Province, Zhejiang Sci-Tech University, Hangzhou 310018, Zhejiang, China

Correspondence and requests for materials should be addressed to Y. Tong (E-mail: tongyun@mail.ustc.edu.cn)

## Table of contents

|                                                                                                                                                                                                                    |    |
|--------------------------------------------------------------------------------------------------------------------------------------------------------------------------------------------------------------------|----|
| <b>Figure S1.</b> The XRD pattern of S-CoNi/CP sample.....                                                                                                                                                         | 3  |
| <b>Figure S2.</b> The XRD pattern of S, Pt-CoNi/CP sample. ....                                                                                                                                                    | 3  |
| <b>Figure S3.</b> (a-d) The SEM images of S-Co/NF sample.....                                                                                                                                                      | 4  |
| <b>Figure S4.</b> (a-d) The SEM images of S-Ni/NF sample. ....                                                                                                                                                     | 5  |
| <b>Figure S5.</b> (a, b) The SEM images of S-CoNi/NF sample.....                                                                                                                                                   | 6  |
| <b>Figure S6.</b> (a, b) The SEM images of S, Pt-CoNi/NF sample.....                                                                                                                                               | 6  |
| <b>Figure S7.</b> (a, b) The TEM images of S-CoNi/NF sample.....                                                                                                                                                   | 7  |
| <b>Figure S8.</b> The XPS survey spectrum of S-CoNi/NF sample. ....                                                                                                                                                | 7  |
| <b>Figure S9.</b> The XPS survey spectrum of S, Pt-CoNi/NF sample. ....                                                                                                                                            | 8  |
| <b>Figure S10.</b> (a) The polarization curves and (b) Tafel slopes of NF, Pt-NF, S, Pt-NF and S, Pt-CoNi/NF samples. ....                                                                                         | 9  |
| <b>Figure S11.</b> (a) The polarization curves and (b) Tafel slopes of Pt-CoNi/NF and S, Pt-CoNi/NF samples. ....                                                                                                  | 9  |
| <b>Figure S12.</b> The mass activity of Pt/C and S, Pt-CoNi/NF samples for HER in 1 M KOH. ....                                                                                                                    | 10 |
| <b>Figure S13.</b> Polarization curves before and after 3000 cycles of S, Pt-CoNi/NF for HER in 1 M KOH. ....                                                                                                      | 10 |
| <b>Figure S14.</b> The cyclic voltammetry curves of (a) S-Co/NF, (b) S-Ni/NF, (c) S-CoNi/NF and (d) S, Pt-CoNi/NF electrodes in 1.0 M KOH recorded at different scan rates from 20 to 100 mV s <sup>-1</sup> ..... | 11 |
| <b>Figure S15.</b> The XRD pattern of S, Pt-CoNi/CP sample after HER test. ....                                                                                                                                    | 12 |
| <b>Figure S16.</b> (a-d) The SEM images of S, Pt-CoNi/NF sample after HER test. ....                                                                                                                               | 12 |
| <b>Figure S17.</b> High-resolution XPS spectra of (a) Co 2p, (b) Ni 2p, (c) Pt 4f and (d) S 2p for S, Pt-CoNi/NF after HER test. ....                                                                              | 13 |
| <b>Table S1.</b> The summary of synthesis conditions for the samples.....                                                                                                                                          | 14 |

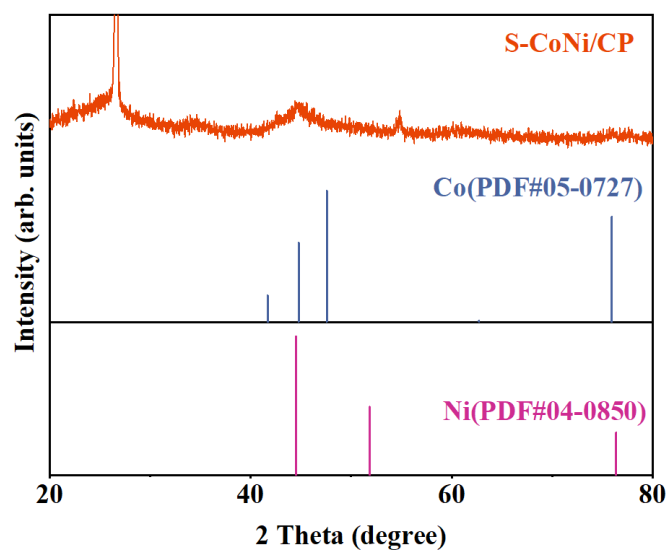

**Figure S1.** The XRD pattern of S-CoNi/CP sample.

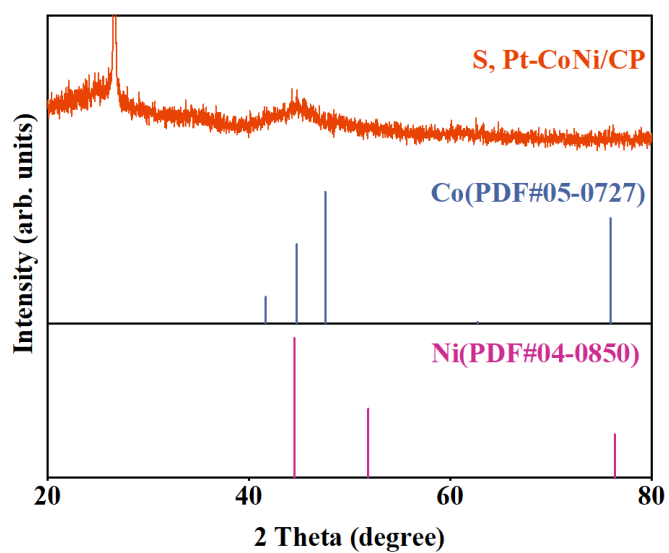

**Figure S2.** The XRD pattern of S, Pt-CoNi/CP sample.

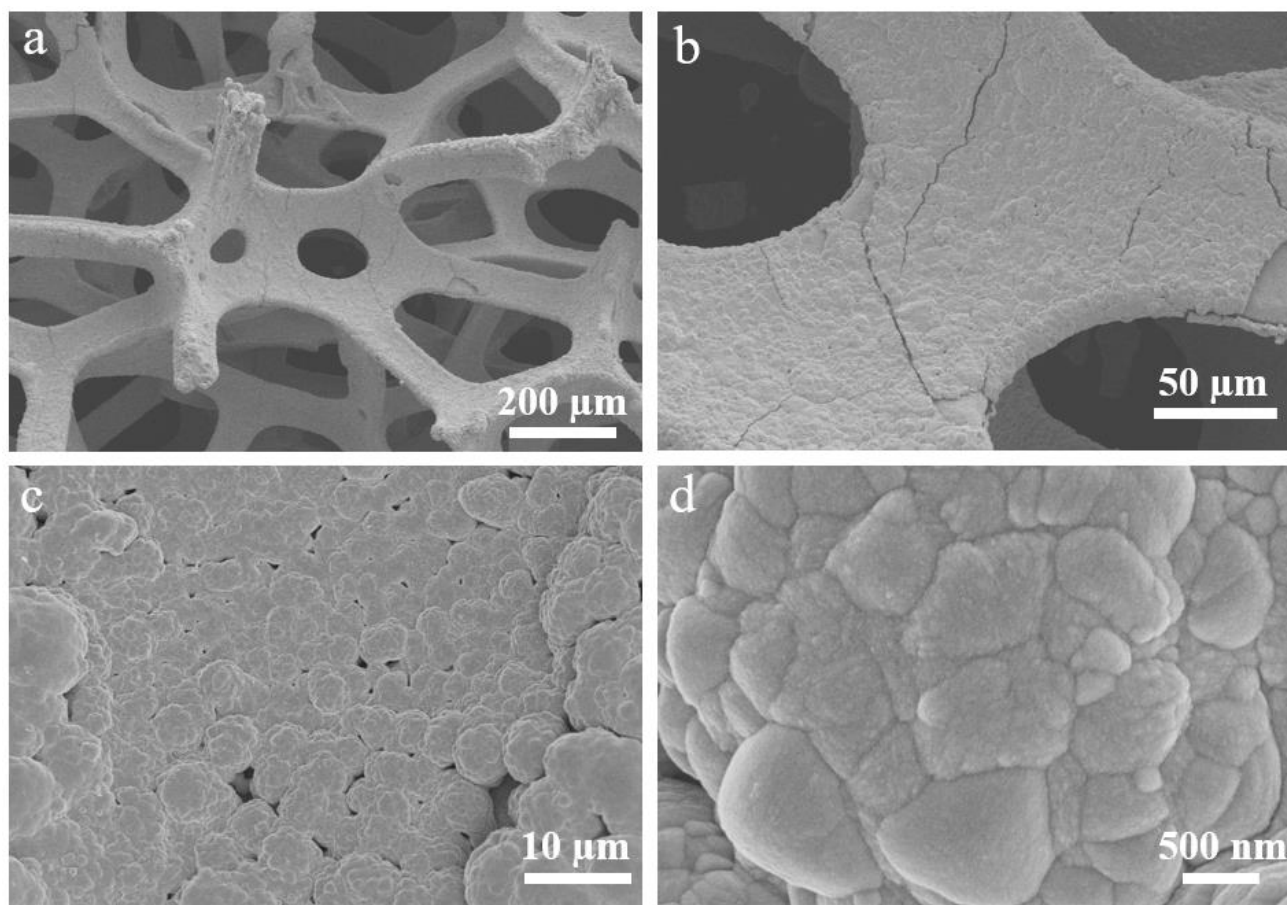

**Figure S3.** (a-d) The SEM images of S-Co/NF sample.

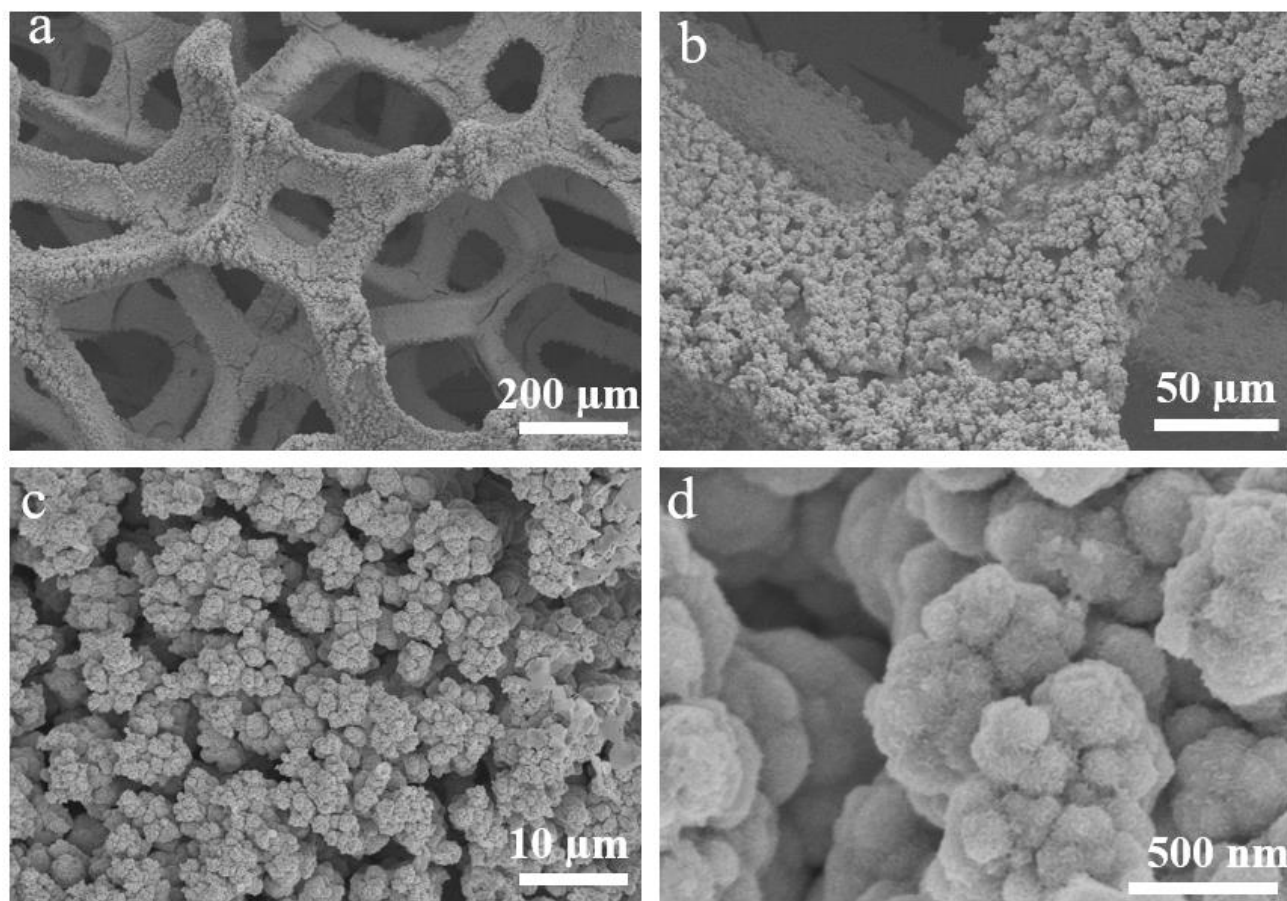

**Figure S4.** (a-d) The SEM images of S-Ni/NF sample.

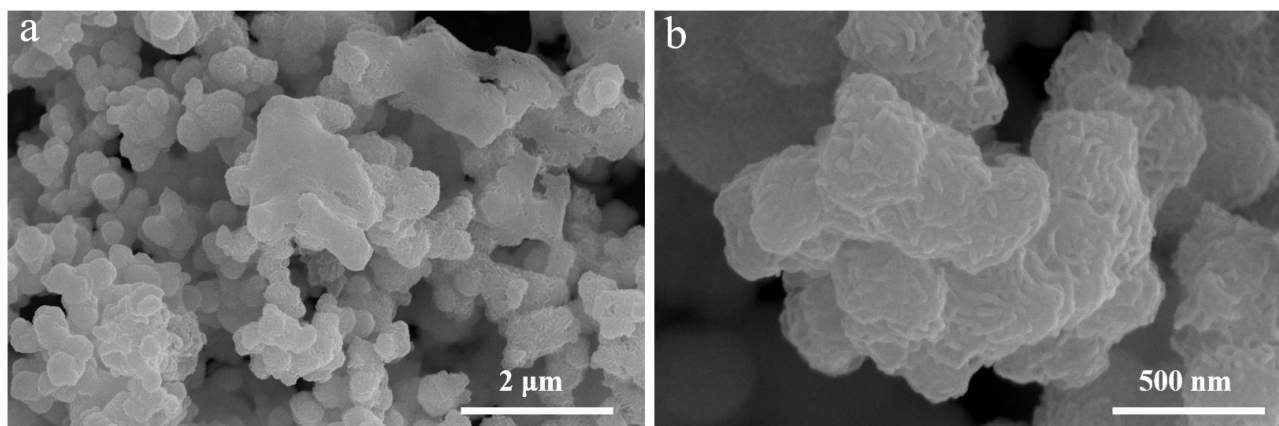

**Figure S5.** (a, b) The SEM images of S-CoNi/NF sample.

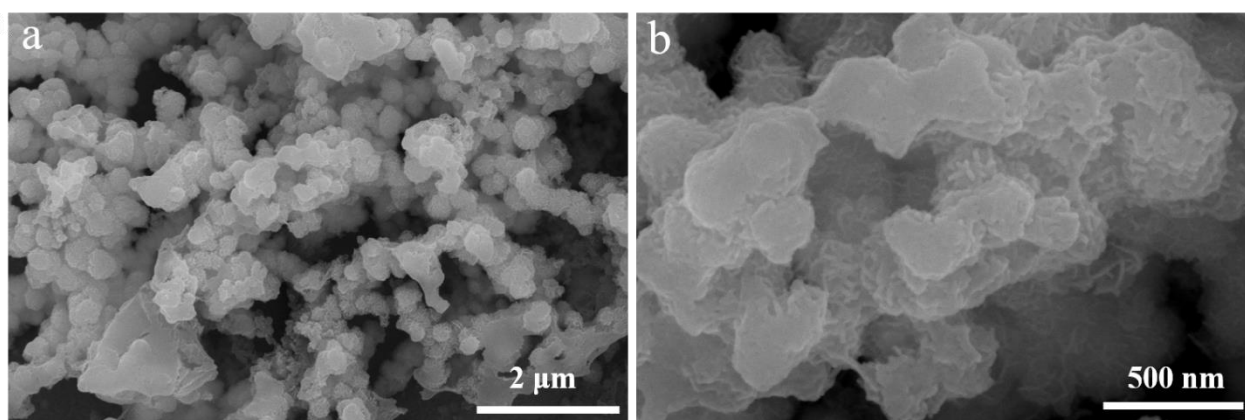

**Figure S6.** (a, b) The SEM images of S, Pt-CoNi/NF sample.

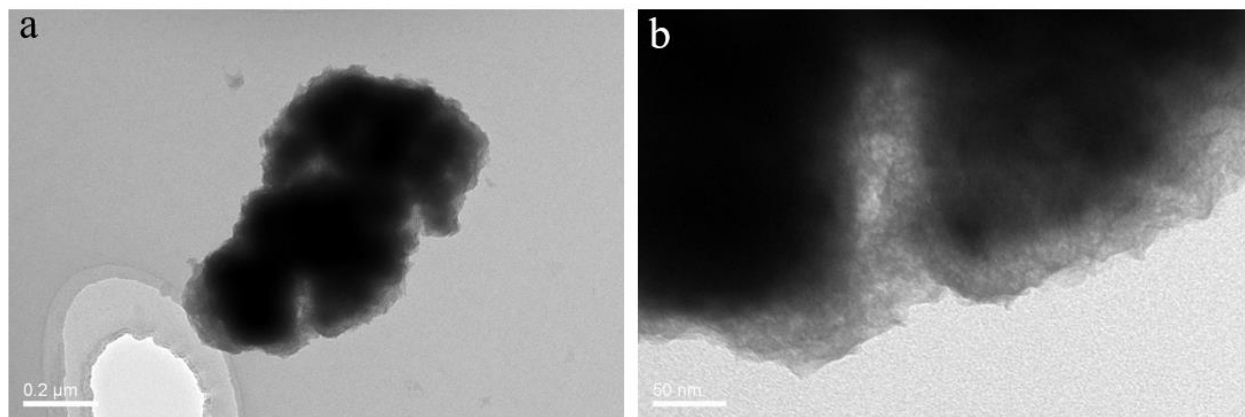

**Figure S7.** (a, b) The TEM images of S-CoNi/NF sample.

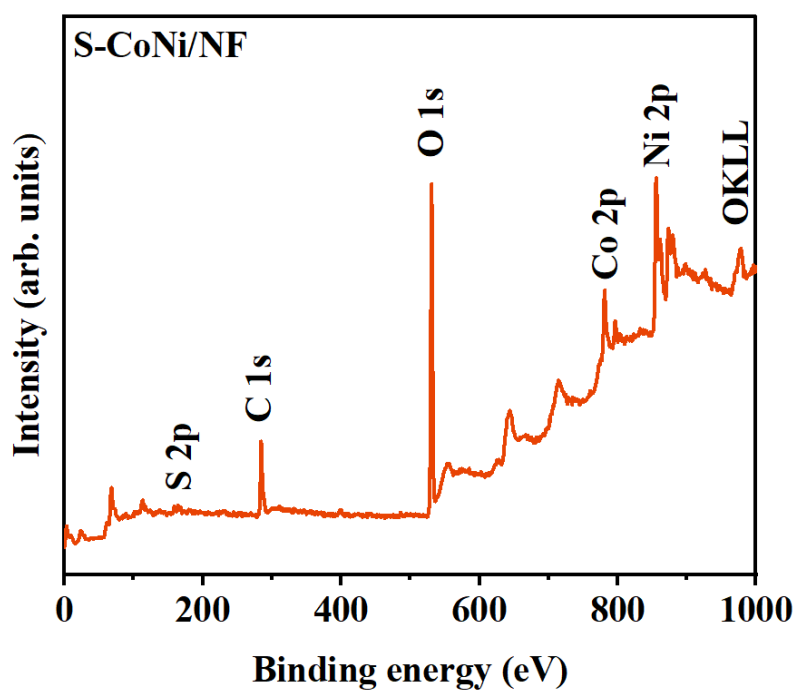

**Figure S8.** The XPS survey spectrum of S-CoNi/NF sample.

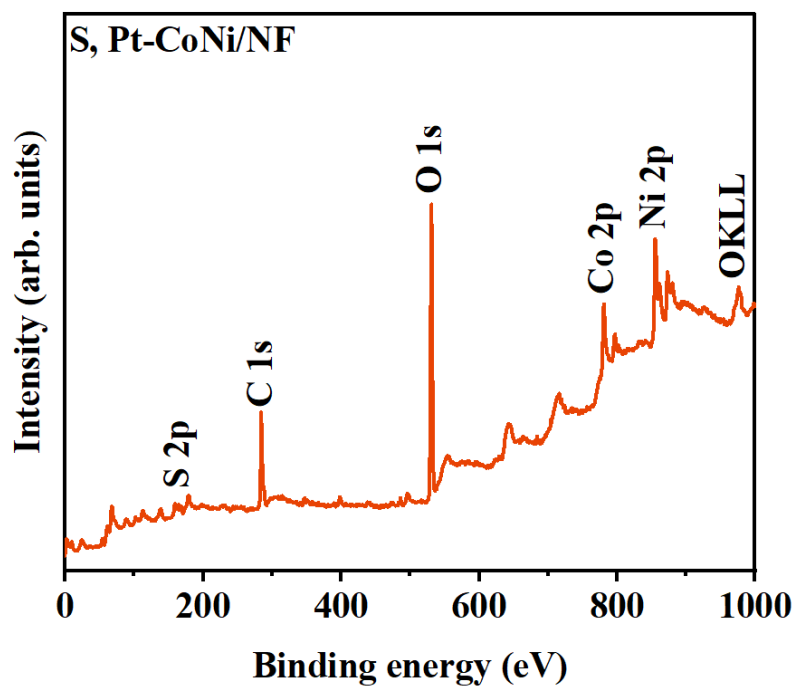

**Figure S9.** The XPS survey spectrum of S, Pt-CoNi/NF sample.

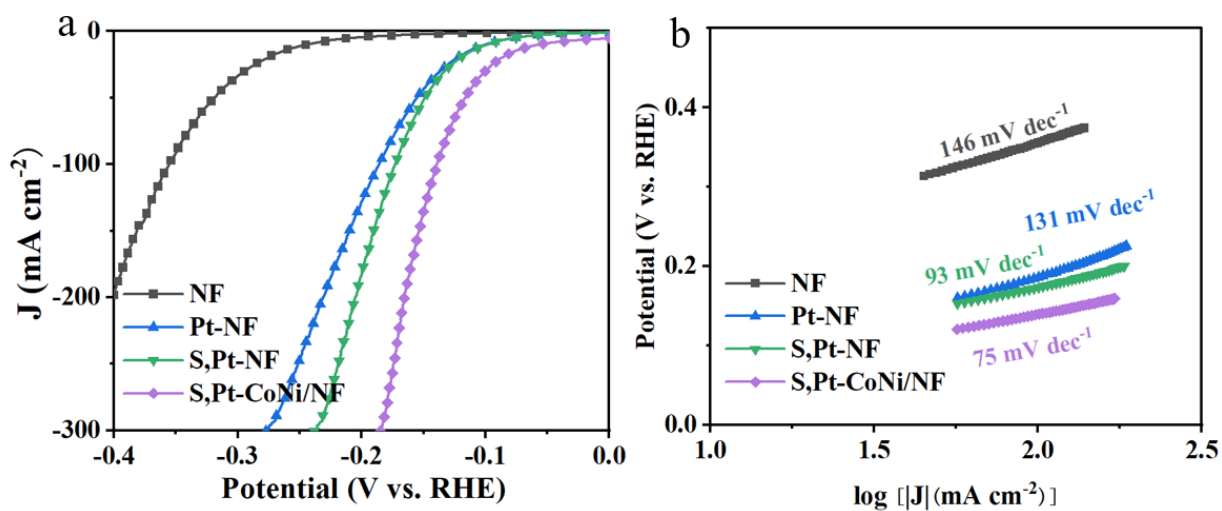

**Figure S10.** (a) The polarization curves and (b) Tafel slopes of NF, Pt-NF, S, Pt-NF and S, Pt-CoNi/NF samples.

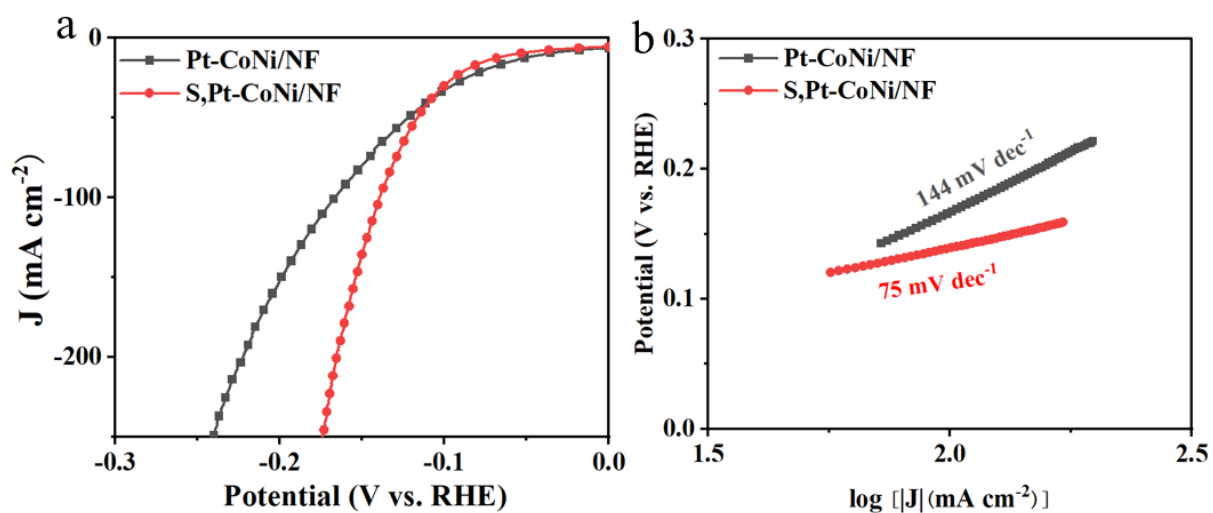

**Figure S11.** (a) The polarization curves and (b) Tafel slopes of Pt-CoNi/NF and S, Pt-CoNi/NF samples.

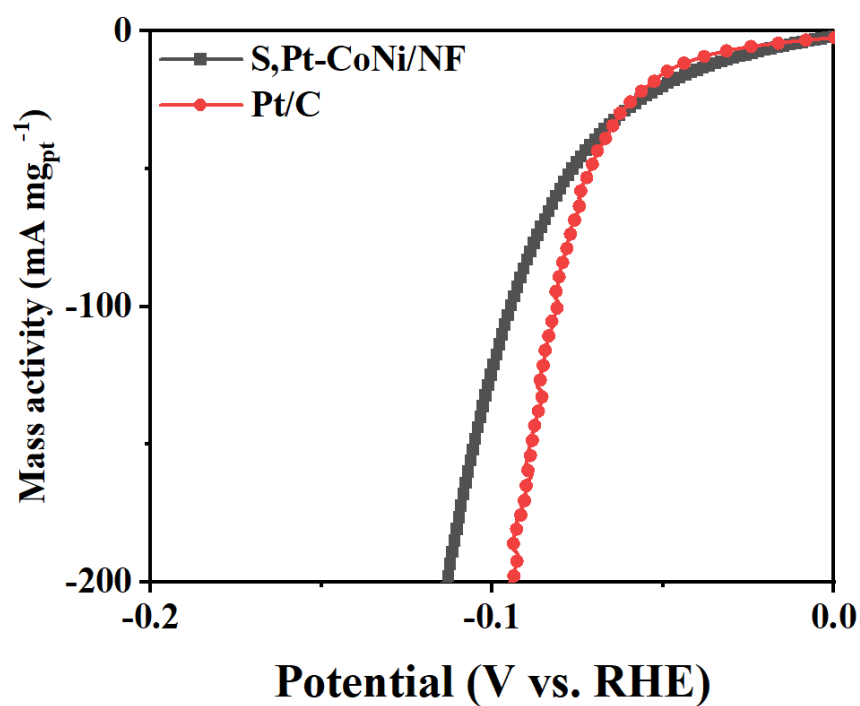

**Figure S12.** The mass activity of Pt/C and S, Pt-CoNi/NF samples for HER in 1 M KOH.

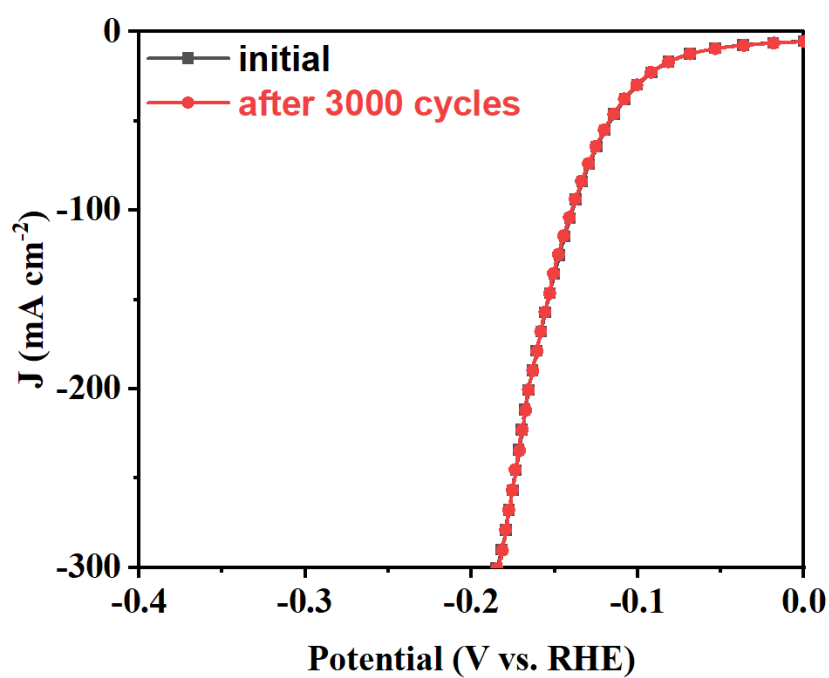

**Figure S13.** Polarization curves before and after 3000 cycles of S, Pt-CoNi/NF for HER in 1 M KOH.

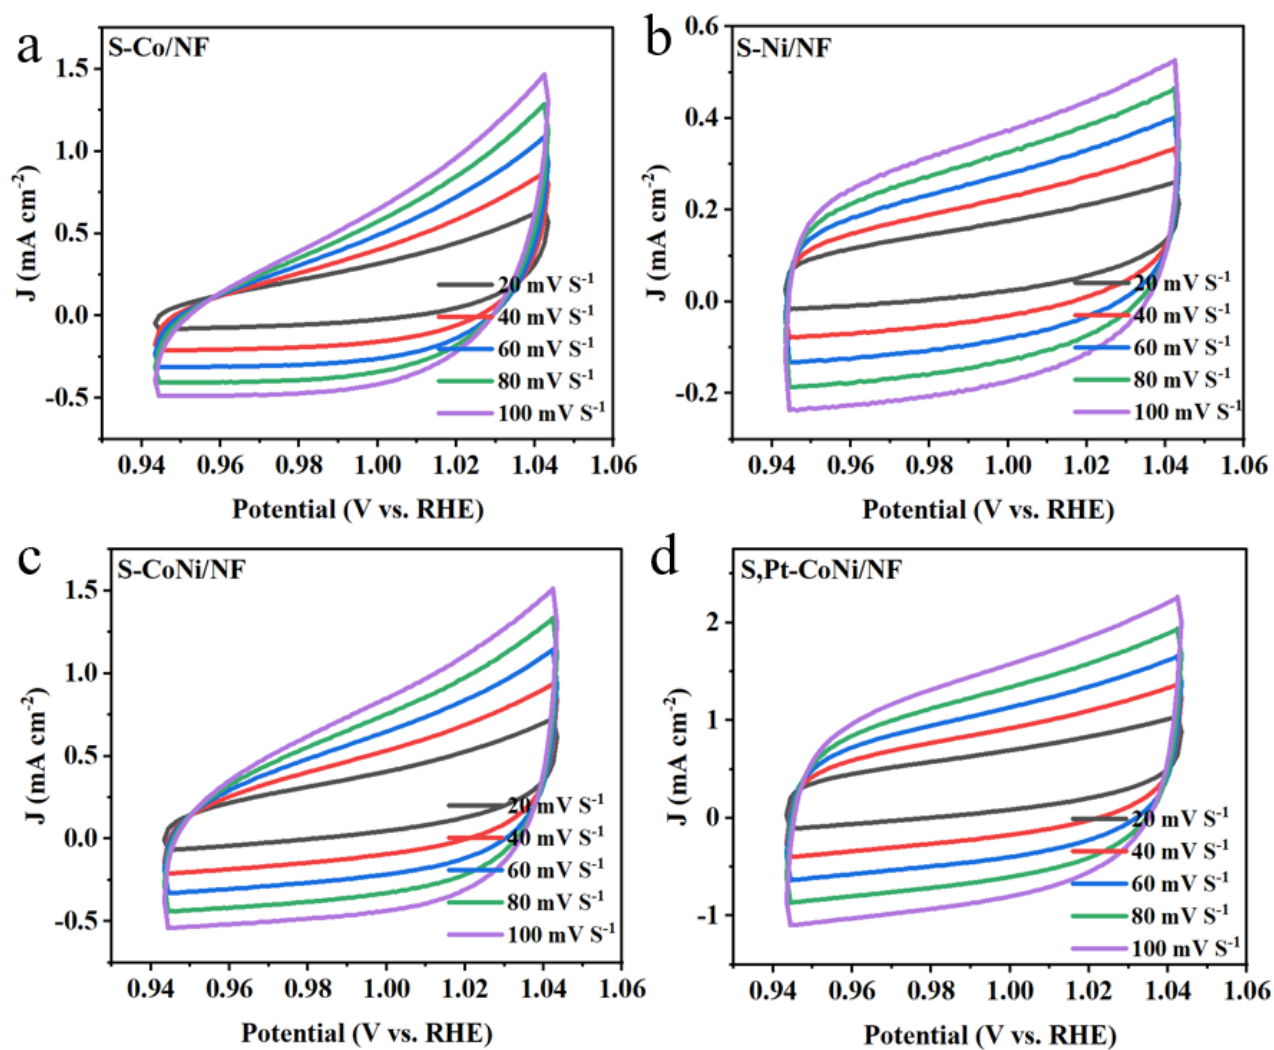

**Figure S14.** The cyclic voltammetry curves of (a) S-Co/NF, (b) S-Ni/NF, (c) S-CoNi/NF and (d) S, Pt-CoNi/NF electrodes in 1.0 M KOH recorded at different scan rates from 20 to 100 mV s<sup>-1</sup>.

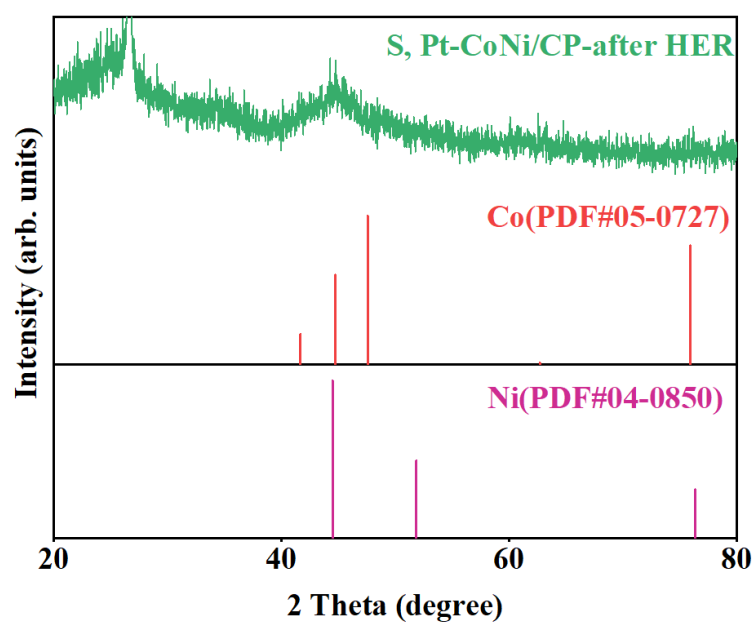

**Figure S15.** The XRD pattern of S, Pt-CoNi/CP sample after HER test.

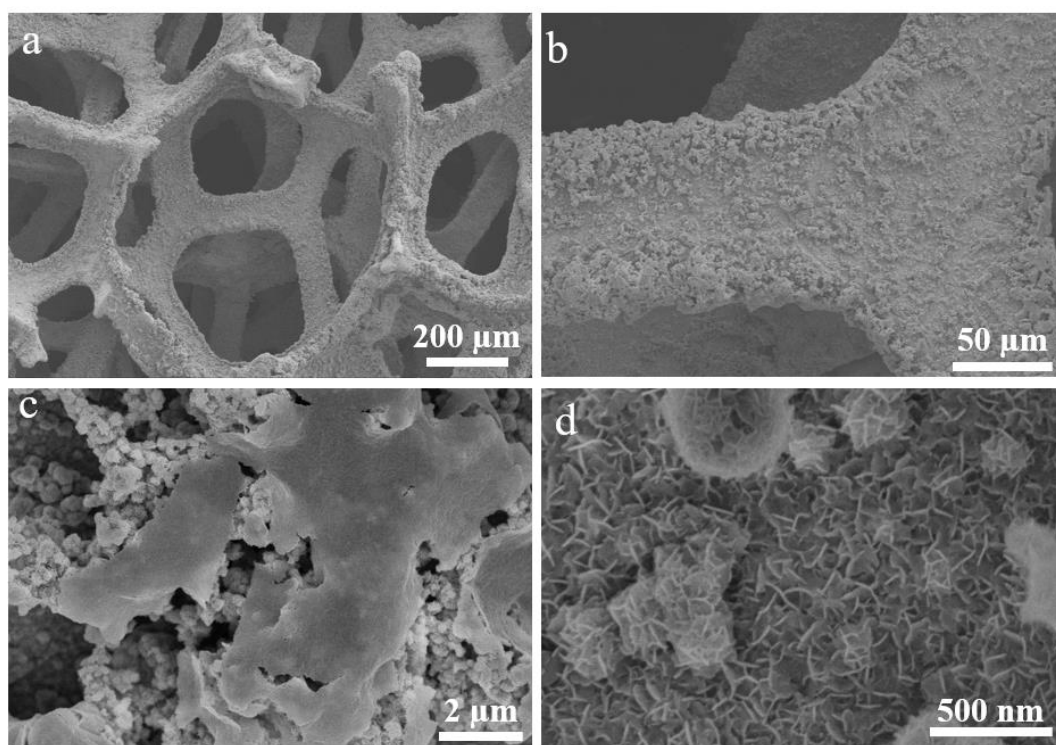

**Figure S16.** (a-d) The SEM images of S, Pt-CoNi/NF sample after HER test.

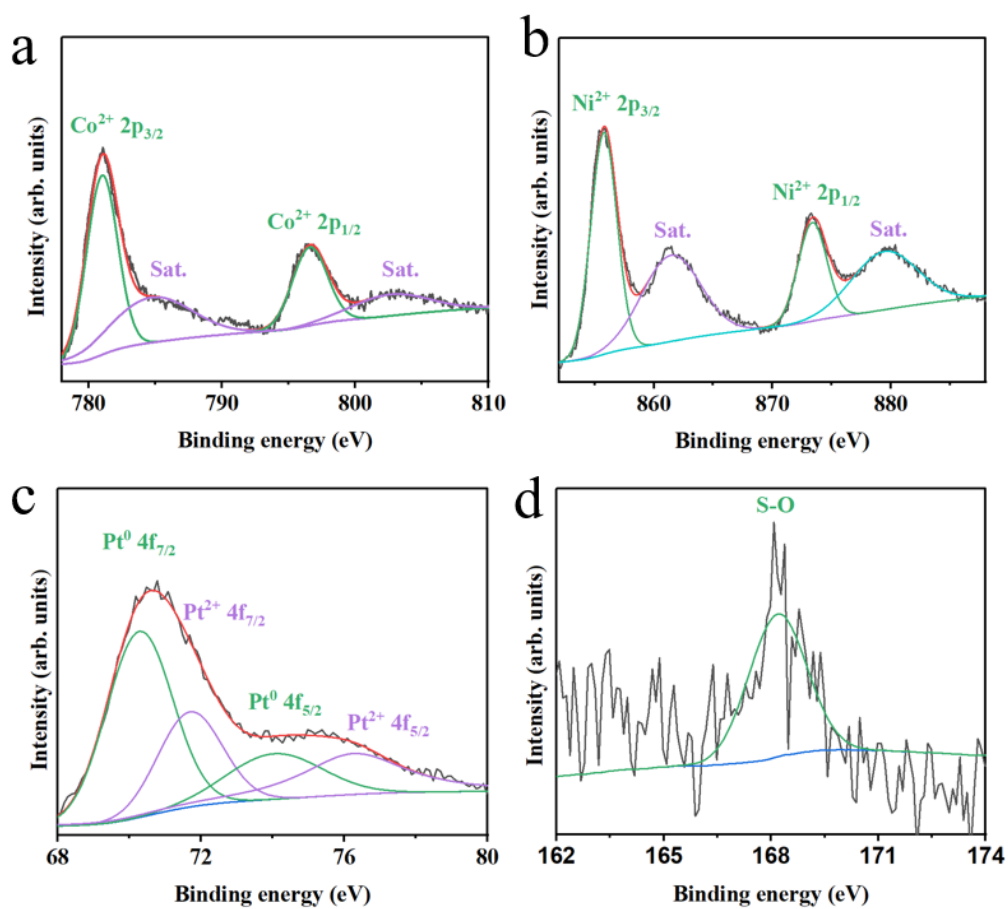

**Figure S17.** High-resolution XPS spectra of (a) Co 2p, (b) Ni 2p, (c) Pt 4f and (d) S 2p for S, Pt-CoNi/NF after HER test.

**Table S1.** The summary of synthesis conditions for the samples.

| Catalyst   | Loading mass<br>(mg cm <sup>-2</sup> ) | Electrodeposition<br>voltage (V) | Electrodeposition<br>time (s) |
|------------|----------------------------------------|----------------------------------|-------------------------------|
| S-Co/NF    | 6.2                                    | -2                               | 400                           |
| S-Ni/NF    | 5.3                                    | -2                               | 400                           |
| S-CoNi/NF  | 6.1                                    | -2                               | 400                           |
| S, Pt-CoNi | 4.2                                    | -2                               | 400                           |
| Pt/C       | 5.0                                    | -2                               | 400                           |
